# Supplementary material
Source: publisher figshare collection journal article supplement (https://gsajournals.figshare.com/ndownloader/files/26826983)
Supplement: Supplementary file 1 [file 26826983]

## Sheet: Sheet1
Supplemental Table 2 – Genotyping primers used in this study
Primer Name	Primer Sequence
aste1_1_HRMA_F	AGTGGTCAGACAGTTCTTCGAG
aste1_1_HRMA_R	TCTTCCCCACAGACAGGTCAT
aste1_HRMA_F3	GGATCAGATTCACGGAGGAGAC
aste1_HRMA_R3	TGTCAGGAGGGTGTCCCATT
bach1a_1_HRMA_F	GCTTTCGAGCACACTCTTCTG
bach1a_1_HRMA_R	AACCACTAAGCCATCCATCAGC
bach1a_2_HRMA_F	TCAAGATGTAAGACGGCGGAG
bach1a_2_HRMA_R	TGGGGTCCAAACATGAACAG
bach1b_1_HRMA_F	TCTTCTGTGCGATGTGACTGT
bach1b_1_HRMA_R	ATGAGTGGACACACGAGCAC
bach1b_2_HRMA_F	GGTTGTGTATGCAGTCGAGTT
bach1b_2_HRMA_R	GATGCTGAAGCAGCAGAGTTT
dlb_1_HRMA_F	TTCTGAGGACGTGATCTCCG
dlb_1_HRMA_R	CTTGAAGTGAAAAGGCACCCG
dlb_2_HRMA_F	TTCCCTCAACAGAGAATCAAAACA
dlb_2_HRMA_R	TCGCCAAAGTGAACATCCTGA
egr1_HRMA_F1	AAGCCCTTTGCCTGCGAGAT
egr1_HRMA_R1	GTTTGAAACTGAGCTCTGCACT
foxg1c_2_HRMA_F	CCATCCGACACAACTTGAGC
foxg1c_2_HRMA_R	AACATCGTCACTCGACGGG
junba_1_HRMA_F	CGAACCCTACCGGAACCTCA
junba_1_HRMA_R	CGCCGTTACCGTTCTGGATG
junba_2_HRMA_F	ATCAAAGCGGAGCGCAAGAG
junba_2_HRMA_R	GTCCGGCGTTATCCGACTT
junbb_1_HRMA_F	AATGGAGCAGCCGTTTTACC
junbb_1_HRMA_R	CATGCCCGGTTTCTGGAGTT
junbb_2_HRMA_F	TCAAGGCGGAACGCAAGAG
junbb_2_HRMA_R	CGTTGTCGGACTTCAGTACCT
m17_1_HRMA_F	GCCGTTCAGTTAGTGCAACC
m17_1_HRMA_R	TGTCCAAGAGCTTCACTGTCA
m17_2_HRMA_F	GCTGGCTCAGGAATGGGTAT
m17_2_HRMA_R	ACCTGGATCCTCCAACCAAC
nr1d1_1_HRMA_F	CCACAGGGTTTCTTTCGACG
nr1d1_1_HRMA_R	ATGCCCACTGACAGACACTTT
nr1d1_2_HRMA_F	GACCGCAGTAAAGAGACCCAG
nr1d1_2_HRMA_R	ACATTCATCTCAGGCGCCAC
pfkfb1_1_HRMA_F	TTCGAGGCCCCAGTTTACAA
pfkfb1_1_HRMA_R	TGAGTTGGGACTCCAATCCAAT
pfkfb1_2_HRMA_F	CAGGTACCTTGTGAATCGGGT
pfkfb1_2_HRMA_R	TTCTTCCCAGCAGGTTGAGC
rab44_1_HRMA_F	AGGATGTTTCTGCTGTGACTGA
rab44_1_HRMA_R	CGCCTCTTCTCCGTGAGACT
rab44_2_HRMA_F	ACACAGGAAAGGGCTCAAGATG
rab44_2_HRMA_R	CGAGTGGAAAAACACAACAATCCA
spi1a_HRMA_F2	GCGAGGCGTCTTTCAGTTCT
spi1a_HRMA_R2	TGACCTTTTTGACCTCCCCG
spi1b_HRMA_F2	GAAGGACAGCATCTGGTGGG
spi1b_HRMA_R2	TGCGATTGCCCTTCTGGATG
taz_HRMA_F1	ACAATTGAGGCCACAGGCTTT
taz_HRMA_R1	TCTGCCTTCACTAACTCACCA
yap1_HRMA_F1	GTATGTCTCTGTCTCCCCTTAGC
yap1_HRMA_R1	GCTGGGTTCATGATGTTCTGTT
